# Supplementary material
Source: publisher figshare collection journal article supplement (https://tandf.figshare.com/ndownloader/files/13273589)
Supplement: Supplementary file 1 [file 13273589]

**Supplementary information**


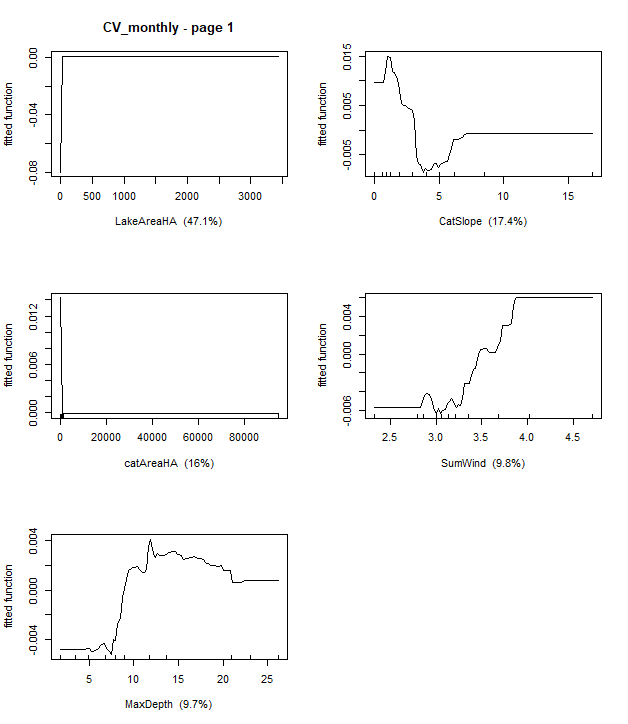


Figure S1: Partial dependence plots for Boosted Regression Tree (BRT) analyses relating monthly variability (calculated as coefficient of variation values) to key lake and catchment characteristics.


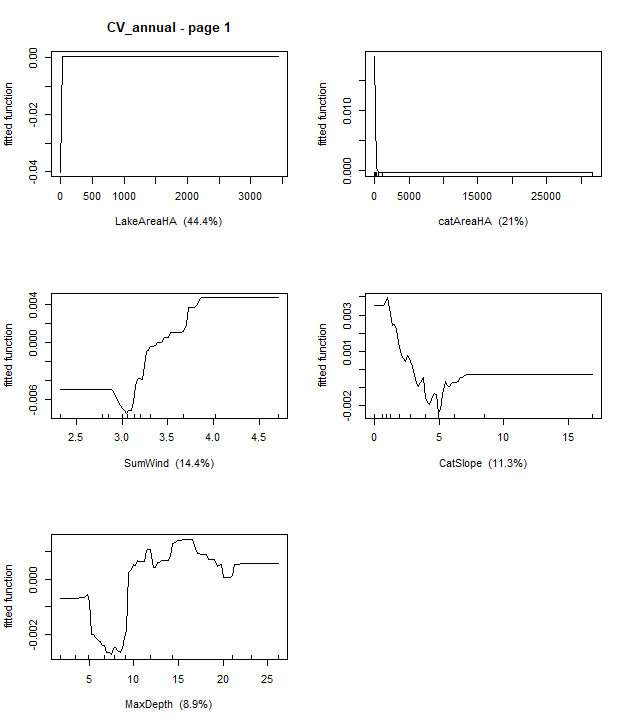


Figure S2: Partial dependence plots for Boosted Regression Tree (BRT) analyses relating annual variability (calculated as coefficient of variation values) to key lake and catchment characteristics.


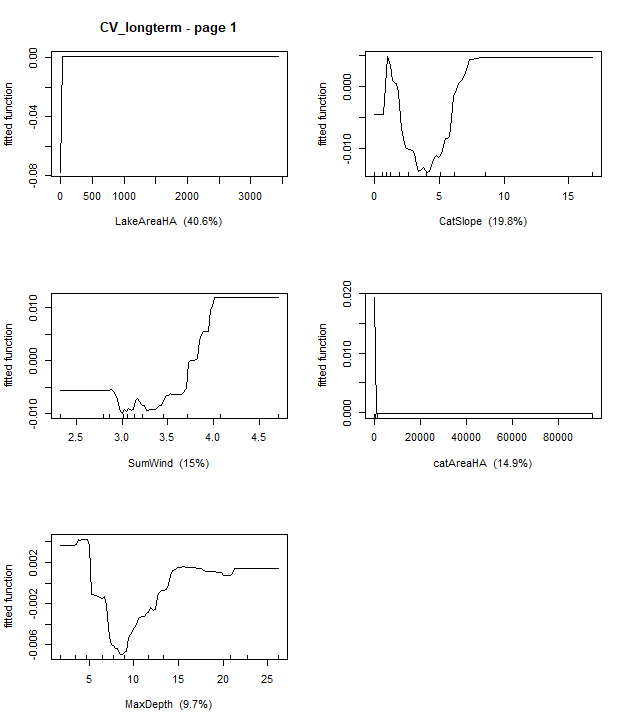


Figure S3: Partial dependence plots for Boosted Regression Tree (BRT) analyses relating long-term variability (calculated as coefficient of variation values) to key lake and catchment characteristics.


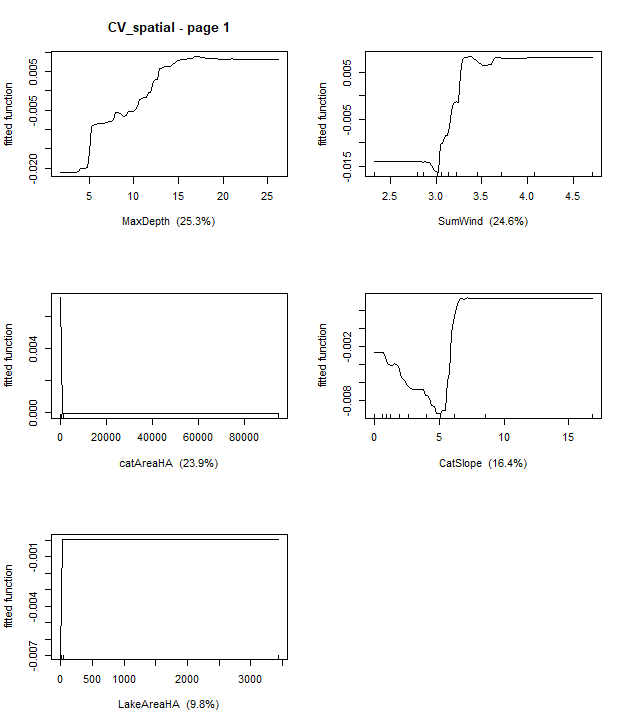


Figure S4: Partial dependence plots for Boosted Regression Tree (BRT) analyses relating spatial variability (calculated as coefficient of variation values) to key lake and catchment characteristics.
